# Parent of origin DNA methylation as a potential mechanism for genomic imprinting in bees.

Marshall, H.<sup>1\*</sup>, Nicholas, M.T.<sup>1</sup>, van Zweden, J.S.<sup>2</sup>, Wäckers, F.<sup>3,4</sup>, Ross, L.<sup>5</sup>, Wenseleers, T.<sup>2</sup>, and Mallon, E.B.<sup>1\*</sup>

\*Corresponding Authors

<sup>1</sup>Department of Genetics and Genome Biology, The University of Leicester, UK.

<sup>2</sup>Laboratory of Socioecology and Social Evolution, Department of Biology, KU Leuven, Belgium.

<sup>3</sup>Biobest Belgium N.V., Westerlo, Belgium.

<sup>4</sup>The Lancaster Environmental Centre, University of Lancaster, UK.

<sup>5</sup>The Institute for Evolutionary Biology, University of Edinburgh, UK.

Friday 17<sup>th</sup> December, 2021

1 **Contact:** hollie\_marshall@hotmail.co.uk, ebm3@leicester.ac.uk.

2 **Keywords**— DNA methylation, reciprocal cross, genomic imprinting, social insect, bumblebee.

3 **Abstract**

4 *Genomic imprinting is defined as parent-of-origin allele-specific expression. In order for genes*  
5 *to be expressed in this manner an ‘imprinting’ mark must be present to distinguish the parental*  
6 *alleles within the genome. In mammals imprinted genes are primarily associated with DNA*  
7 *methylation. Genes exhibiting parent-of-origin expression have recently been identified in two*  
8 *species of Hymenoptera with functional DNA methylation systems; *Apis mellifera* and *Bombus**  
9 **terrestris*. We carried out whole genome bisulfite sequencing of parents and offspring from*  
10 *reciprocal crosses of two *B. terrestris* subspecies in order to identify parent-of-origin DNA*  
11 *methylation. We were unable to survey a large enough proportion of the genome to draw*  
12 *a conclusion on the presence of parent-of-origin DNA methylation however we were able to*  
13 *characterise the sex- and caste-specific methylomes of *B. terrestris* for the first time. We find*  
14 *males differ significantly to the two female castes, with differentially methylated genes involved in*  
15 *many histone modification related processes. We also analysed previously generated honeybee*  
16 *whole genome bisulfite data to see if genes previously identified as showing parent-of-origin*  
17 *DNA methylation in the honeybee show consistent allele-specific methylation in independent*  
18 *data sets. We have identified a core set of 12 genes in female castes which may be used for future*  
19 *experimental manipulation to explore the functional role of parent-of-origin DNA methylation in*  
20 *the honeybee. Finally, we have also identified allele-specific DNA methylation in honeybee male*  
21 *thorax tissue which suggests a role for DNA methylation in ploidy compensation in this species.*

## 22 **Introduction**

23 Genomic imprinting is defined as parent-of-origin allele-specific expression (Rodrigues and Zilber-  
24 man, 2015). Deviating from Mendel's Law of Dominance, the expression of imprinted genes is  
25 determined by the parental origin of each allele irrespective of the underlying genotype. In order for  
26 genes to be expressed in this manner, an epigenetic 'imprinting mark' must be present to distinguish  
27 the parental alleles within the genome. In mammals and flowering plants, imprinted genes are  
28 primarily associated with DNA methylation in areas of the genome known as imprinting control  
29 regions (ICRs) (Barlow and Bartolomei, 2014). The presence of DNA methylation, as an imprinting  
30 mark, has been associated with both allelic silencing as well as allelic expression (Drewell *et al.*,  
31 2012; Barlow, 2011).

32 DNA methylation can serve to repress expression of a individual allele by preventing a  
33 transcription factor from binding to a promoter region (Drewell *et al.*, 2012). It is also thought DNA  
34 methylation can signal the recruitment of histone modifications which result in heterochromatin  
35 formation, silencing the expression of all alleles within a region (Barlow, 2011; Xu *et al.*, 2021).  
36 DNA methylation can also enable allele-specific expression of imprinted genes by silencing an  
37 'imprinting control element', such as a long non-coding RNA, which, when expressed, would cause  
38 transcriptional silencing of nearby genes (Barlow, 2011). It is also worth noting whilst most identified  
39 imprinted genes in mammals have some association with DNA methylation there are cases where  
40 imprinting has been observed independently of DNA methylation and instead associated solely with  
41 a particular histone modification (Inoue *et al.*, 2017).

42 The function of DNA methylation in insects is largely unknown and thought to be variable  
43 based on the range of overall levels between taxonomic orders (Provataris *et al.*, 2018). However,  
44 multiple insect species have now been show to display parent-of-origin gene expression, including the  
45 mealybug *Planococcus citri* (de la Filia *et al.*, 2021) and two Hymenopteran species, the bumblebee,  
46 *Bombus terrestris* (Marshall *et al.*, 2020b) and the honeybee *Apis mellifera* (Kocher *et al.*, 2015;

47 Galbraith *et al.*, 2016; Smith *et al.*, 2020; Galbraith *et al.*, 2021). In Hymenoptera, DNA methylation  
48 has been associated with caste differences in various species (Lyko *et al.*, 2010; Bonasio *et al.*, 2012;  
49 Amarasinghe *et al.*, 2014; Glastad *et al.*, 2016). However, a casual link has yet to be established  
50 (Oldroyd and Yagound, 2021b). The leading theory for the evolution of genomic imprinting, Haig's  
51 kinship theory (Haig, 2000), predicts social insects should display imprinted genes. It is also thought  
52 genomic imprinting in social insects could contribute to caste differentiation (Matsuura *et al.*, 2018)  
53 and the evolution of sociality (Matsuura, 2019). Although no association between the level of  
54 sociality of a species and the level of DNA methylation has been found (Weiner *et al.*, 2013; Glastad  
55 *et al.*, 2017).

56 Insect DNA methylation, like mammalian DNA methylation, is generally found in a CpG  
57 context (referring to a cytosine base immediately followed by a guanine base) (Glastad *et al.*, 2014).  
58 It is found at lower levels, with <1% - 14% of CpGs being methylated, compared to mammals where  
59 around 70% of CpG sites are methylated (Bewick *et al.*, 2016; Feng *et al.*, 2010). Additionally DNA  
60 methylation in insects is generally located in gene bodies and associated with more highly expressed  
61 genes, such as housekeeping genes (Provataris *et al.*, 2018; Elango *et al.*, 2009; Foret *et al.*, 2009).  
62 This suggests if DNA methylation does play a role in imprinted genes in insects, it may not function  
63 the same as imprinted DNA methylation marks in mammals.

64 Here, we set out to explore how robust parent-of-origin DNA methylation is within the species  
65 of bees which display genes showing parent-of-origin expression, to investigate the hypothesis that  
66 DNA methylation can act as an epigenetic mark for genomic imprinting in social insects (Oldroyd and  
67 Yagound, 2021a). Firstly, we attempt to identify parent-of-origin DNA methylation in the eusocial  
68 bumblebee *Bombus terrestris*. There is some evidence that parent-of-origin DNA methylation exists  
69 in honeybees (Wu *et al.*, 2020), however this was found to not directly correlate with genes previously  
70 identified as showing parent-of-origin expression. Given that genes showing parent-of-origin  
71 expression appear to have evolved rapidly within Hymenoptera (Marshall *et al.*, 2020b) it is worth  
72 investigating this potential role of DNA methylation in other species. *B. terrestris* has previously

73 been shown to exhibit parent-of-origin gene expression of both maternally derived and paternally  
74 derived alleles (Marshall *et al.*, 2020b), *B. terrestris* possess a fully functional methylation system  
75 (Amarasinghe *et al.*, 2014; Liu *et al.*, 2018; Marshall *et al.*, 2019) and it displays allele-specific  
76 methylation at multiple loci throughout the genome (Lonsdale *et al.*, 2017; Marshall *et al.*, 2020a).  
77 Some of these allele-specific DNA methylation events may represent parent-of-origin imprinting  
78 marks.

79 As part of this first component we have generated whole genome bisulfite sequencing (WGBS)  
80 libraries from head tissue of the parents and pooled worker offspring from two reciprocal crosses.  
81 Male *B. terrestris* are haploid meaning every worker daughter inherits the same copy of the paternal  
82 genome, whilst queens are diploid meaning there are two possible maternal alleles that can be present  
83 in the offspring. Whole genome re-sequencing (WGS) of the parents was used to identify SNPs  
84 unique to the father and homozygous SNPs unique to the queen mother to identify the parental origin  
85 of alleles within the offspring genome, allowing parent-of-origin DNA methylation to be identified.  
86 As the WGBS data generated here are also the first DNA methylation libraries for queens and males  
87 we have also explored the sex- and caste-specific methylome of *B. terrestris*.

88 In the second part of this study we explore how robust previously identified parent-of-origin  
89 DNA methylation in the honeybee is (Wu *et al.*, 2020). We have identified allele-specific DNA  
90 methylation in data from multiple recent honeybee studies to see if previously identified genes  
91 showing parent-of-origin DNA methylation appear to be present across independently generated  
92 data sets for both diploid female castes (queens and workers) and across different tissues. Finally, we  
93 also explore the potential presence of allele-specific DNA methylation in honeybee male somatic  
94 tissue, where some cells show varying levels of ploidy (Aron *et al.*, 2005), to see if female imprinted  
95 genes may hold an alternative role in haploid males.

## 96 **Methods**

### 97 **Sample collection**

98 Reciprocal crosses of *B. terrestris dalmatinus* (native to southern Europe) and *B. terrestris audax*  
99 (native to the UK) were carried out by Biobest, Leuven. Four successful colonies (one of each cross  
100 direction) from two genetically distinct 'families' (Fig. 1a) were housed at the University of Leuven  
101 and kept in 21°C with red light conditions, they were fed *ad libitum* with pollen and a sugar syrup.  
102 Callow workers were tagged with numbered disks in order to determine age. Worker reproductive  
103 status was confirmed by ovary dissection, ovaries were scored on a 0-4 scale as in Duchateau and  
104 Velthuis (1988), entire bodies were then stored at -80°C along with the original queen mothers and  
105 male fathers. Three reproductive workers, aged 16-17days, were selected from queenless conditions  
106 from each of the four colonies (supplementary 1.0.0, Fig.1a).

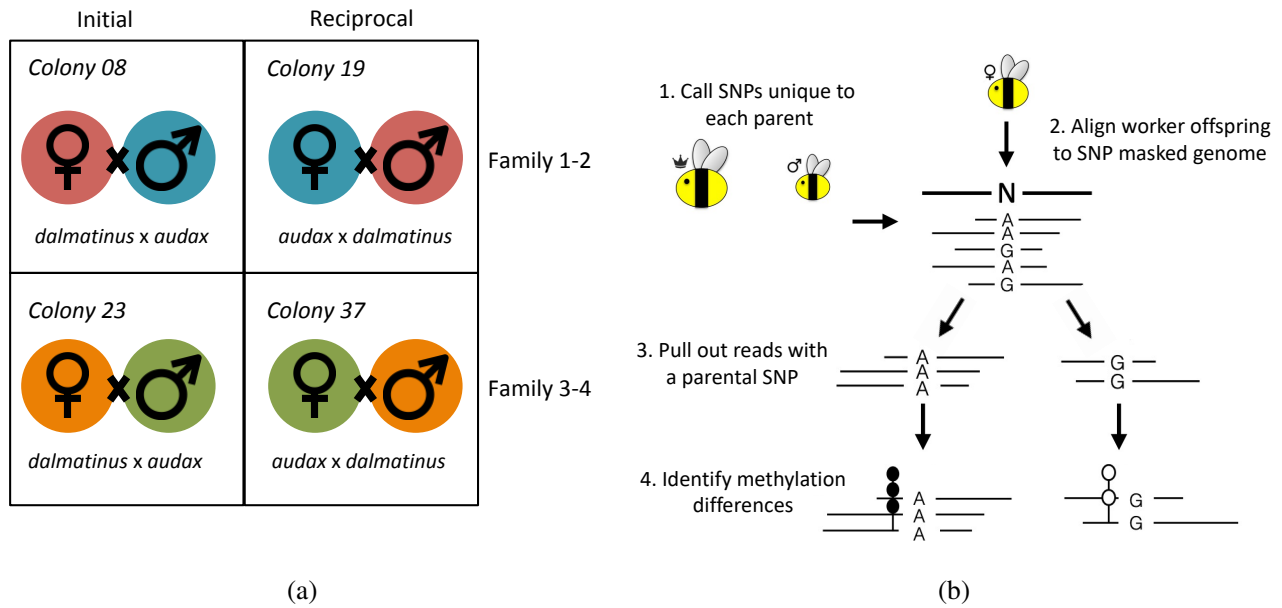

Figure 1: (a) Graphic display of the family-wise reciprocal crosses carried out between *Bombus terrestris audax* and *Bombus terrestris dalmaninus*. Each colour refers to related individuals, i.e. the queen from colony 08 is the sister of the male used in colony 19. This design reduces genetic variability between the initial and reciprocal crosses as we do not have inbred lines of *B. terrestris*. (b) Overview schematic for identifying allelic methylation differences in the worker offspring. SNPs unique to either the mother or father are used to create N-masked reference genomes. The worker daughter sample is then aligned to the genome and reads are filtered to keep only those with an informative parental SNP. Methylation differences between the alleles can then be assessed and parent-of-origin DNA methylation can be inferred from comparing reciprocal crosses.

## 107 DNA extraction and sequencing

108 Whole genome bisulfite sequencing was generated for the parents and offspring of each colony.  
 109 DNA was extracted from whole heads of the mother and father of each colony as well as from 12  
 110 reproductive workers (three per colony) using the Qiagen DNeasy<sup>®</sup> Blood & Tissue Kit following  
 111 the manufacturers protocol. Reproductive workers were chosen to reduce the variation between  
 112 samples as sterile and reproductive workers show different DNA methylation profiles (Marshall *et al.*,  
 113 2019). Each sample was treated with RNase. DNA from the three reproductive worker samples per  
 114 colony was pooled in equal quantities to produce one representative offspring sample per colony.  
 115 DNA quantity and quality were determined by Nanodrop and Qubit<sup>®</sup> fluorometers as well as via

116 gel electrophoresis. Samples were sent to BGI Tech Solution Co., Ltd.(Hong Kong) for library  
117 preparation, bisulfite treatment and sequencing. Paired-end libraries (2 x 150bp) were sequenced  
118 across two lanes of an Illumina HiSeq 4000 platform with 40% phiX inclusion. A 1% lambda DNA  
119 spike was included in all libraries in order to assess bisulfite conversion efficiency, as the lambda  
120 genome is known to be unmethylated.

121 Whole genome re-sequencing of the parents was also carried out. DNA was extracted from half  
122 of the thorax of each mother and father per colony following a custom protocol ([https://github.com/agdelafilia/wet\\_lab/blob/master/gDNA\\_extraction\\_protocol.md](https://github.com/agdelafilia/wet_lab/blob/master/gDNA_extraction_protocol.md)). DNA quan-  
123 tity and quality were determined by Nanodrop and Qubit® fluorometers as well as via gel elec-  
124 trophoresis. Samples were sent to Novogene Co., Ltd. for library preparation and sequencing.  
125 Paired-end libraries (2 x 150bp) were sequenced on an Illumina HiSeq 4000 platform.

## 127 **Differential DNA methylation between castes and sexes**

128 Whole genome bisulfite sequencing (WGBS) data of the parents and pooled worker offspring were  
129 checked using fastqc v.0.11.5 (Andrews, 2010) and poor quality bases were trimmed using cutadapt  
130 v.1.11 (Martin, 2011). Libraries were then aligned to the reference genome (Bter\_1.0, Refseq  
131 accession no. GCF\_000214255.1, (Sadd *et al.*, 2015)) using Bismark v.0.16.1 (Krueger and Andrews,  
132 2011) and bowtie2 v.2.2.6 (Langmead and Salzberg, 2013) with standard parameters (supplementary  
133 1.0.1). Bismark was also used to extract methylation calls and carry out deduplication. Coverage  
134 outliers (above the 99.9th percentile) were removed along with bases covered by less than 10 reads.  
135 The methylation status of each CpG was then determined via a binomial model, where the success  
136 probability is the non-conversion rate determined from the lambda spike. CpG sites were then  
137 filtered to remove any site that did not return as methylated in at least one sample.

138 Differential methylation was assessed at the CpG level in pair-wise comparisons (queen-male,  
139 queen-worker, male-worker) using the R package methylKit v.1.16.1 (Akalin *et al.*, 2012). A logistic  
140 regression model was applied to each comparison with Benjamini-Hochberg correction for multiple

141 testing (Benjamini and Hochberg, 1995). For a CpG to be differentially methylated a minimum  
142 difference of at least 10% methylation and a q-value of <0.01 were required. Genes were determined  
143 as differentially methylated genes if they contained an exon with at least two differentially methylated  
144 CpGs and an overall weighted methylation (Schultz *et al.*, 2012) difference across the exon of >15%.  
145 Two CpGs were chosen based on Xu *et al.* (2021), they find the methylation of two CpGs is enough  
146 to promote gene transcription in *Bombyx mori* via the recruitment of histone modifications.

### 147 **Identification of parent-of-origin DNA methylation**

148 Whole genome re-sequencing data of the parents were checked using fastqc v.0.11.5 (Andrews,  
149 2010) and aligned to the reference genome (Bter\_1.0, Refseq accession no. GCF\_000214255.1,  
150 (Sadd *et al.*, 2015)) using bowtie2 v.2.2.6 (Langmead and Salzberg, 2013) in *-sensitive* mode  
151 (supplementary 1.0.2). Aligned reads were deduplicated and realigned around indels using GATK  
152 v.3.6 (McKenna *et al.*, 2010). SNPs were called using Freebayes v.0.9.21.7 (Garrison and Marth,  
153 2012) which accounts for ploidy differences between males and females. SNPs were then filtered  
154 using VCFtools v.0.1.16 (Danecek *et al.*, 2011) with the following options: *-max-alleles 2 -minQ 20*  
155 *-min-meanDP 10 -recode -recode-INFO-all*. A custom script was then used to filter SNPs to keep  
156 only homozygous alternative SNPs which are unique to either the mother or father of each colony.  
157 We also removed C-T and T-C SNPs as these are indistinguishable from bisulfite converted bases in  
158 WGBS. This left a mean of 365,372 SNPs per colony, allowing the parental alleles of the offspring  
159 to be identified (supplementary 1.0.3, Fig. 1b). The parental SNPs identified above were then used  
160 to create an N-masked genome for each colony (four total) using the BEDtools v.2.28.0 *maskfasta*  
161 command (Quinlan and Hall, 2010). WGBS libraries from the workers were then aligned to their  
162 respective colony's N-masked genome, using Bismark v.0.16.1 (Krueger and Andrews, 2011) as  
163 above. BEDtools v.2.28.0 (Quinlan and Hall, 2010) was then used to select reads from the WGBS  
164 alignments of the worker offspring which contained either a unique maternal or paternal SNP, i.e.  
165 reads from either the maternal allele or the paternal allele (supplementary 1.0.4). All other reads



166 which did not contain an informative SNP were discarded. Differential methylation between the  
167 maternal and paternal reads of all workers was then carried out using the R package methylKit  
168 v.1.16.1 (Akalın *et al.*, 2012) as above, with the exception of a minimum coverage of eight reads, as  
169 previously described in (Wang *et al.*, 2016).

## 170 **Gene ontology enrichment**

171 Gene ontology (GO) terms for *B. terrestris* were taken from a custom database made in Bebane  
172 *et al.* (2019). GO enrichment analysis was carried out using the hypergeometric test with Benjamini-  
173 Hochberg (Benjamini and Hochberg, 1995) multiple-testing correction,  $q < 0.05$ . GO terms from  
174 differentially methylated genes between sexes and castes were tested against a GO term database  
175 made from the GO terms associated with all methylated genes. Genes were determined as methylated  
176 if they had a mean weighted methylation level greater than the bisulfite conversion error rate of  
177 0.05 in either queens, males or workers. REVIGO (Supek *et al.*, 2011) was used to generate GO  
178 descriptions from the GO ids.

## 179 **Honeybee comparative analysis**

180 To confirm the consistency of parent-of-origin DNA methylation in independently generated honeybee  
181 WGBS data we used the R package DAMEfinder v.1.2.0 (Orjuela *et al.*, 2020) to identify allele-  
182 specific DNA methylation in samples from the following recent studies: Yagound *et al.* (2019,  
183 2020); Cardoso-Júnior *et al.* (2021); Yi *et al.* (2021), totalling 58 unique samples after discarding  
184 poor quality libraries. We quality checked the raw data with fastqc v.0.11.5 (Andrews, 2010)  
185 and trimmed poor quality bases using cutadapt v.1.11 (Martin, 2011). Data were then aligned  
186 to the honeybee reference genome (Amel\_HAv3.1, Refseq accession no. GCA\_003254395.2,  
187 (Wallberg *et al.*, 2019)) using Bismark v.0.16.1 (Krueger and Andrews, 2011) and bowtie2 v.2.2.6  
188 (Langmead and Salzberg, 2013) with standard parameters. We then used methtuple v.1.5.4  
189 (<https://github.com/PeteHaitch/methtuple>) to extract the methylation calls of pairs of

190 CpGs. These data were then used in DAMEfinder v.1.2.0 (Orjuela *et al.*, 2020) to identify  
191 occurrences of allele-specific DNA methylation. For a region to be classed as showing allele-specific  
192 DNA methylation a minimum coverage of 10 was required and a minimum score of 0.8, which is  
193 considered representative of true allele-specific DNA methylation according to Orjuela *et al.* (2020).  
194 We then identified genes which contained allelically methylated regions using R and compared these  
195 gene lists to those which show parent-of-origin DNA methylation, as identified in Wu *et al.* (2020).  
196 Gene ontology enrichment was carried out as above using GO terms from the Hymenoptera Genome  
197 Database (Elsik *et al.*, 2016; Walsh *et al.*, 2021).

## 198 **Results**

### 199 **Genome-wide sex- and caste-specific DNA methylation**

200 It is currently unknown to what extent DNA methylation varies between sexes and castes of *B.*  
201 *terrestris*. We have therefore taken this opportunity to also generally characterise the sex- and  
202 caste-specific methylomes of this species. We find low genome-wide levels similar to those previously  
203 reported in Bebane *et al.* (2019) and Marshall *et al.* (2019), on average  $0.25\% \pm 0.05\%$  across all  
204 samples, with little variation between sexes and castes (supplementary 1.0.1). Reproductive workers,  
205 queens and males do, however, show different CpG methylation profiles, with males clustering away  
206 from the two female castes (Fig.2a). We also see no clustering by sub-species for the males or  
207 queens, for example male 08 in Figure 2a represents *Bombus terrestris audax* and male 19 represents  
208 *Bombus terrestris dalmatinus*.

209 Genome-wide, we see overall similar levels of DNA methylation across various genomic  
210 features for both sexes and castes (Fig.2b). It has recently been shown that promoter DNA methylation  
211 exists in some insect species (Lewis *et al.*, 2020; Bain *et al.*, 2021). We have, therefore, annotated  
212 putative promoter regions in *B. terrestris*, defined at 500bp upstream of a gene with no overlap  
213 with other genomic features, we also added UTR regions and intergenic regions to further explore

214 the genome-wide methylation profile. We find the highest levels of DNA methylation for all sexes  
215 and castes are within exon regions, whilst promoter, and 5' UTR regions show a depletion in DNA  
216 methylation compared to intergenic regions (Fig.2b).

217 We also segregated genes into categories of differing levels of DNA methylation to explore  
218 the potential function of highly methylated genes across sexes and castes. There are a small number  
219 of genes classed as highly methylated (weighted methylation level >0.7) across each sex/caste  
220 (supplementary Fig.S2, supplementary 1.0.5). Most highly methylated genes in queens and workers  
221 are also found in another caste/sex. Whereas males show a larger number of unique genes which are  
222 highly methylated (supplementary Fig.S2, n = 62). We then carried out a gene ontology enrichment  
223 test for each list of highly methylated genes per sex/caste and compared these to lists of genes  
224 classed as methylated (i.e. a weighted methylation level across the gene greater than the lambda  
225 conversion rate) for each sex/caste. We find a variety of GO terms enriched across sexes and castes  
226 mostly involved in core cellular processes (supplementary 1.0.6). Male highly methylated genes did,  
227 however, have a few GO terms enriched for RNA splicing (GO:0008380, GO:0000377, GO:0000387)  
228 which were not present in the queen and worker enriched GO terms.

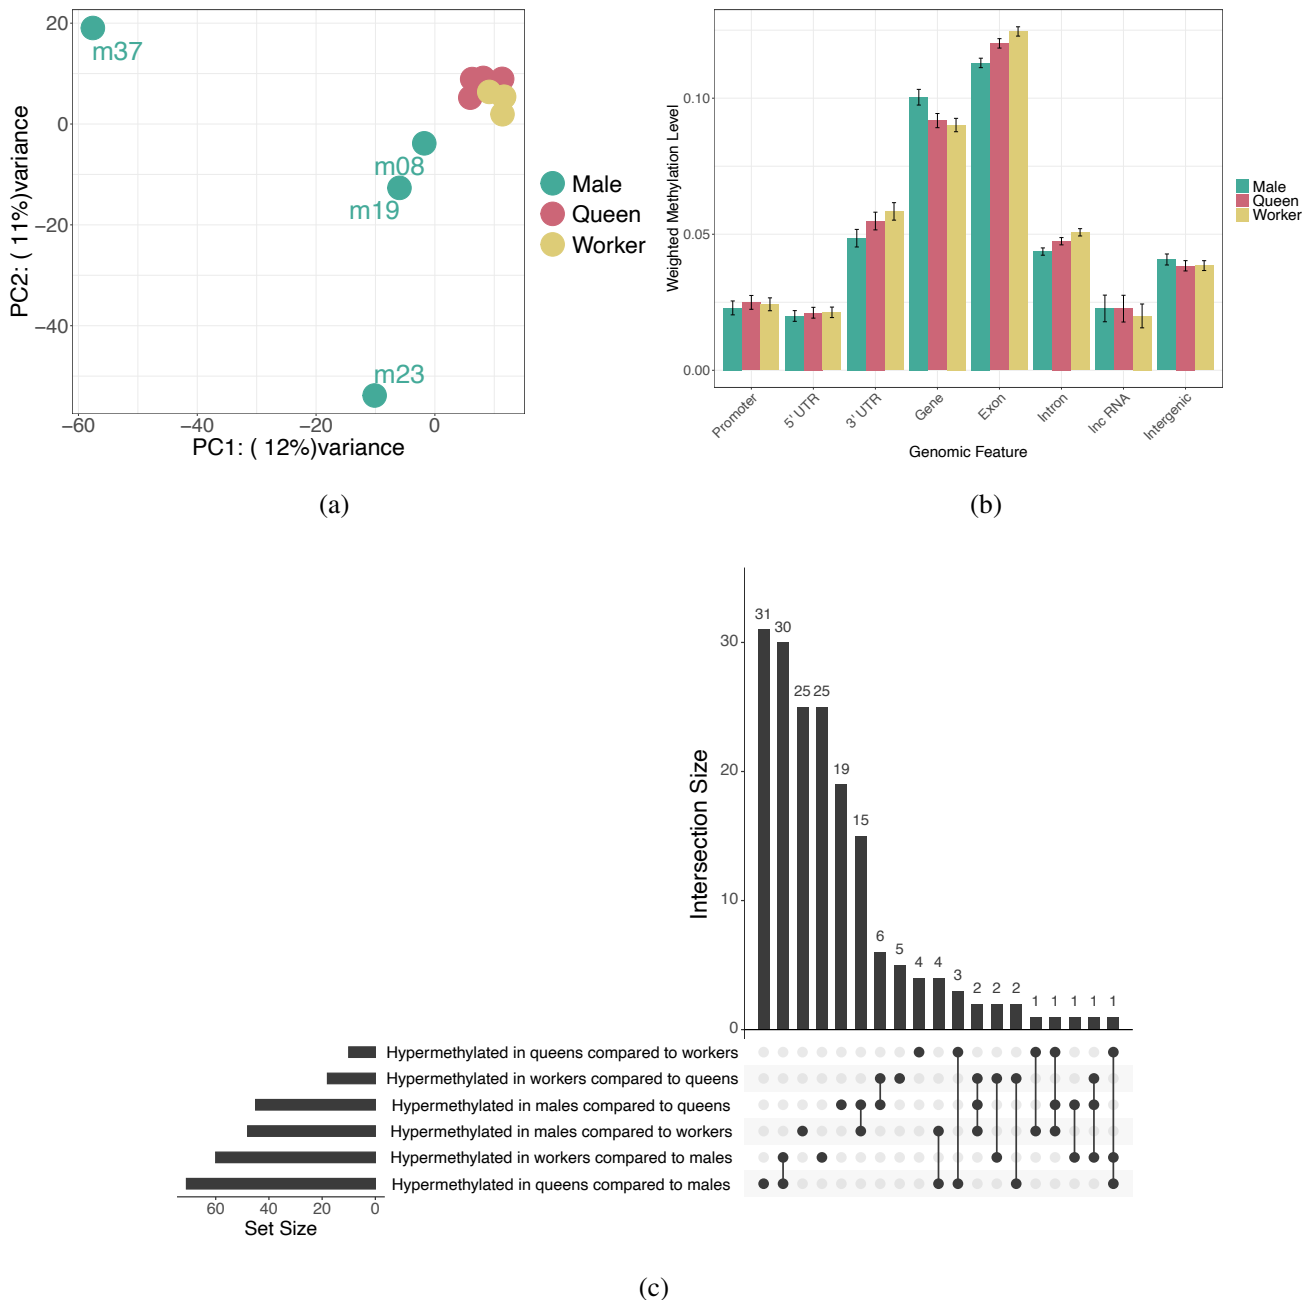

Figure 2: (a) PCA plot based on the methylation level per CpG for all CpGs which had greater than 10X in all samples and were classed as methylated in at least one sample ( $n = 5,304$ ). (b) Bar plot of the mean methylation level of each genomic feature for sexes and castes. Error bars represent 95% confidence intervals of the mean. Promoters are putative and represented by 500bp upstream of a gene without any other genomic feature overlap. (c) Upset plot showing common genes containing a hypermethylated exon per hypermethylated sex/caste per comparison. The set size indicates the total number of hypermethylated genes, the intersection size shows how many of those are common between sets, as indicated by the connections in the bottom panel. E.g. 31 genes are uniquely hypermethylated in queens compared to males and 30 genes are hypermethylated in both queen and workers compared to males.

## 229 **Differential DNA methylation between sexes and castes**

230 A differential DNA methylation analysis between sexes and castes found a total of 1,011 differentially  
231 methylated CpGs between males and reproductive workers, 824 differentially methylated CpGs  
232 between males and queens and 156 differentially methylated CpGs between queens and reproductive  
233 workers. Roughly equal numbers were hypermethylated in each sex/caste per comparison, except for  
234 males and queens where queens show slightly more hypermethylated sites (Chi-squared Goodness  
235 of Fit:  $\chi^2 = 8.97$ ,  $df = 1$ ,  $p\text{-value} < 0.01$ , male  $n = 369$ , queen  $n = 455$ ). The majority of all  
236 differentially methylated CpGs are located within genes and specifically within exons, we also find a  
237 slight depletion of differentially methylated CpGs in the first exon compared to the following exons  
238 (supplementary Fig.S1), this is in line with DNA methylation being slightly lower in the first exon in  
239 *B. terrestris* (Lewis *et al.*, 2020).

240 We next classed a gene as differentially methylated if a given exon contained at least two  
241 differentially methylated CpGs and had an overall weighted methylation difference of at least 15%.  
242 We find 155 genes are differentially methylated between males and workers, 165 between males  
243 and queens and 37 between queens and workers (supplementary 1.0.7). We carried out a GO  
244 enrichment analysis on all differentially methylated genes and on hypermethylated genes for each  
245 sex/caste per comparison (supplementary 1.0.8). Whilst most terms are involved in core cellular  
246 processes, we specifically find differentially methylated genes between queens and workers are  
247 enriched for chromatin remodelling-related terms (e.g. "*histone H3-K27 acetylation*" (GO:0043974)  
248 and "*chromatin organization involved in negative regulation of transcription*" (GO:0097549)) and  
249 reproductive terms (e.g. "*oogenesis*" (GO:0048477)). Differentially methylated genes between  
250 males and workers were also enriched for a large number of histone modification related terms  
251 (e.g. "*histone H3-K27 acetylation*" (GO:0043974), "*histone H3-K9 methylation*" (GO:0051567),  
252 "*regulation of histone H3-K9 trimethylation*" (GO:1900112)) as well as "*dosage compensation*"  
253 (GO:0007549) and some reproductive related terms (e.g. "*gamete generation*" (GO:0007276)).

254 Multiple histone related terms were also found for differentially methylated genes between males and  
255 queens, as well as the above we also found "*histone H4-K20 demethylation*" (GO:0035574), "*histone*  
256 *H4-K8 acetylation*" (GO:0043982), "*histone H4-K16 acetylation*" (GO:0043984) and "*histone H4-K5*  
257 *acetylation*" (GO:0043981).

258 When looking specifically at hypermethylated genes per sex/caste compared to all differentially  
259 methylated genes per comparison we find only two enriched GO terms for hypermethylated genes  
260 in queens compared to workers: "*developmental process involved in reproduction*" (GO:0003006)  
261 and "*gamete generation*" (GO:0007276). In genes hypermethylated in males compared to queens  
262 and workers separately we find a large number of enriched GO terms related to neuron development  
263 amongst other cellular processes.

264 Most of the differentially methylated genes are common between males, queens and work-  
265 ers, with only 178 total unique genes changing methylation levels between sexes/castes (Fig.2c).  
266 Specifically, we find 31 genes are hypermethylated in queens and workers when compared to  
267 males and 18 genes are hypermethylated in males when compared to queens and workers. We  
268 carried out a GO enrichment on these genes using all differentially methylated genes from all  
269 comparisons as a background set. We find general cellular processes enriched in both gene lists with  
270 hypermethylated genes in the female castes also enriched for some telomere-related functions, e.g.  
271 "*telomere organization*" (GO:0032200) and "*regulation of telomere maintenance*" (GO:0032204).

## 272 **Parent-of-origin and lineage-of-origin DNA methylation in *B. terrestris***

273 Using SNPs called from the parental genomes of each colony we were able to identify reads within  
274 the WGBS of the offspring which belong to each parental allele. We analysed each reciprocal cross  
275 separately to maximise the number of common CpG sites covered in the samples. This allowed us  
276 to identify the parental origin of 6,091 and 4,883 CpGs with at least eight times coverage in all  
277 worker samples per cross respectively. Given that in our sex- and caste-specific differential DNA  
278 methylation comparisons we have >2 million CpGs identified, we calculate that we have only been

279 able to survey around 0.25% of the bumblebee methylome for parent-of-origin and lineage-of-origin  
280 DNA methylation. We therefore present this component of the paper as a learning experience in the  
281 hope to improve future research in this field (see discussion).

282 Of the 6,091 and 4,883 CpG identified, three and two respectively were classed as being  
283 methylated in at least one sample by a binomial test and were tested for parent-of-origin and lineage-  
284 of-origin effects. None of these positions show evidence of parent-of-origin or lineage-of-origin  
285 DNA methylation.

## 286 **Consistency of parent-of-origin DNA methylation in the honeybee**

287 In order to explore the consistency of parent-of-origin DNA methylation in independently generated  
288 honeybee data sets we selected genes from Wu *et al.* (2020) which contained a minimum of two  
289 CpGs showing parent-of-origin DNA methylation. Using a list of unique genes from either sterile or  
290 reproductive samples from either of the two genetic blocks tested in Wu *et al.* (2020) we selected a final  
291 list of 166 unique genes which show parent-of-origin DNA methylation, 91 with paternal-of-origin  
292 DNA methylation and 75 with maternal-of-origin DNA methylation (supplementary 1.0.9).

293 We then called allele-specific DNA methylation in independently generated honeybee female  
294 data sets ( $n = 33$ ) spanning various tissues of both workers and queens from Cardoso-Júnior *et al.*  
295 (2021); Yi *et al.* (2021) and Yagound *et al.* (2020). We find around 1,500 genes per sample show  
296 allele-specific DNA methylation with slightly lower numbers in worker thorax tissue (Fig.S3). Of  
297 the 166 identified genes which show parent-of-origin DNA methylation, 132 are found in at least one  
298 independent data set showing allele-specific DNA methylation. Specifically, each data set shows  
299 allele-specific DNA methylation for between 45-53% of the 166 genes with parent-of-origin DNA  
300 methylation (Fig.S3). From these we have identified a core set of 12 genes which are present in all  
301 33 data sets, six of which show maternal-of-origin DNA methylation and six show paternal-of-origin  
302 DNA methylation as determined in Wu *et al.* (2020) (Table 1).

303 In order to further explore the function of these core 12 genes we carried out a gene ontology

304 enrichment analysis using all unique genes with allele-specific DNA methylation as a background  
305 set (n = 3,448). We find a variety of terms enriched, including many involved in nervous system  
306 development and the term "*social behaviour*" (GO:0035176) (supplementary 1.1.1).



Table 1: List of the 12 genes which show parent-of-origin DNA methylation in Wu *et al.* (2020) as well as allele-specific DNA methylation in all 33 independent honeybee female data sets. The mean ASM score represents the mean allele-specific DNA methylation score called by DAMFinder taken across all 33 data sets, a score >0.8 is indicative of true allele-specific DNA methylation (Orjuela *et al.*, 2020). \* These genes also show allele-specific DNA methylation in at least 50% of all male thorax samples tested.

| BEEBASE  | LOC ID    | Name                                              | Parent-of-origin |       | Mean ASM |
|----------|-----------|---------------------------------------------------|------------------|-------|----------|
|          |           |                                                   | DNA methylation  | Score |          |
| GB41287  | LOC412544 | protein dopey-1 homolog                           | Maternal         | 1.12  |          |
| GB41714  | LOC727150 | uncharacterized                                   | Paternal         | 1.18  |          |
| GB41884  | LOC412746 | calcineurin-binding protein cabin-1               | Maternal         | 1.02  |          |
| GB42246  | LOC551731 | rho GTPase-activating protein 190                 | Paternal         | 1.08  |          |
| GB46478  | LOC412224 | tectonin beta-propeller repeat-containing protein | Maternal         | 1.12  |          |
| GB47418  | LOC409282 | bromodomain-containing protein                    | Maternal         | 1.14  |          |
| GB47466  | LOC552221 | F-BAR domain only protein 2                       | Maternal         | 1.18  |          |
| GB48854* | LOC413947 | sodium leak channel non-selective protein         | Paternal         | 1.09  |          |
| GB50958  | LOC408286 | 2-oxoglutarate dehydrogenase, mitochondrial       | Maternal         | 1.3   |          |
| GB51276* | LOC551848 | protocadherin-like wing polarity protein stan     | Paternal         | 1.09  |          |
| GB51956* | LOC412281 | protein purity of essence                         | Paternal         | 1.15  |          |
| GB53269  | LOC412643 | uncharacterized                                   | Paternal         | 1.13  |          |

307 We also examined genes which show both parent-of-origin DNA methylation from Wu  
308 *et al.* (2020) and allele-specific DNA methylation in at least half of all data sets ( $n \geq 16$ ), which  
309 gave a total of 91 genes, 46 of which show maternal-of-origin DNA methylation and 45 show  
310 paternal-of-origin DNA methylation (supplementary 1.1.2). A GO enrichment analysis of these  
311 genes using all genes which show allele-specific DNA methylation as a background set revealed a  
312 variety of processes including multiple nervous system development terms, histone modification  
313 related terms (e.g. "*histone H4-K20 demethylation*" GO:0035574) and some terms involved in  
314 reproduction (e.g. "*oocyte nucleus migration involved in oocyte dorsal/ventral axis specification*"  
315 GO:0007312).

316 In addition to identifying this core set of genes which show potentially consistent parent-  
317 of-origin DNA methylation across multiple independent data sets, we also ran this pipeline for  
318 some male samples as previous research has shown a diploid genome exists in some tissues of *A.*  
319 *mellifera* males as a potential mechanism of dosage compensation (Mittwoch *et al.*, 1966; Aron  
320 *et al.*, 2005). As expected we find little to no allele-specific DNA methylation in sperm samples  
321 (supplementary Fig.S4). As there is only one allele present any arising allele-specific methylation  
322 events are likely false positives. However, we do find between 332-538 genes showing allele-specific  
323 DNA methylation in male thorax tissue, across 10 replicate samples from Yagound *et al.* (2020).

324 We checked these genes which show allele-specific DNA methylation to see if they were  
325 also called as showing parent-of-origin DNA methylation in Wu *et al.* (2020). Of the 166 genes  
326 which show parent-of-origin DNA methylation, 79 are found in at least one male sample showing  
327 allele-specific DNA methylation. Each data set shows allele-specific DNA methylation for between  
328 18-24 (i.e. 10-14%) of the genes which show parent-of-origin DNA methylation identified in Wu  
329 *et al.* (2020) (Fig.S4). There is one gene which is present in all 10 data sets showing allele-specific  
330 DNA methylation and parent-of-origin DNA methylation, this is *protein crumbs* (LOC725591,  
331 GB46140), which is maternally methylated in females. GO terms associated with this gene are  
332 involved in multiple body plan developmental processes.

333           There are also 12 genes which show allele-specific DNA methylation in at least 50% of the  
334 male thorax data sets ( $n \geq 5$ , supplementary 1.1.2), seven of which show maternal methylation in  
335 females and five of which show paternal methylation in females. Gene ontology terms enriched for  
336 these 12 genes compared to all genes showing allele-specific DNA methylation in males ( $n = 2,010$ )  
337 included many histone demethylation terms (e.g. "*histone H3-K9 demethylation*" GO:0033169 and  
338 "*histone H3-K27 demethylation*" GO:0071557), "*social behaviour*" (GO:0035176) and various other  
339 developmental processes (supplementary 1.1.1). Of these 12 genes, three also show allele-specific  
340 DNA methylation in all female data sets (Table 1). Upon inspection of the GO terms related to these  
341 genes we find GB48854 is driving the enriched term involved in social behaviour and GB51276  
342 and GB51956 are driving nervous system development enriched GO terms. Interestingly, whilst not  
343 enriched the GO term spermatid development is associated with GB51956.

## 344 **Discussion**

345 In this study we have explored the potential of DNA methylation as an imprinting mark in social bees.  
346 We conducted reciprocal crosses to explore parent-of-origin DNA methylation in the bumblebee  
347 *Bombus terrestris*. Whilst our crosses and data generation were successful, we were unable to  
348 confidently identify genome-wide parent-of-origin DNA methylation. We were, however, able to  
349 use these data to characterise the sex- and caste-specific DNA methylation profiles of *B. terrestris*  
350 for the first time. We find genome-wide that sexes and castes show similar DNA methylation  
351 profiles, however there are a number of genes which are differentially methylated between sexes  
352 and castes. Males specifically show a large number of differentially methylated genes involved in  
353 other epigenetic processes, such as histone modifications and chromatin dynamics. We also mined  
354 previously generated honeybee whole genome bisulfite sequencing data to explore the consistency of  
355 parent-of-origin DNA methylation, as identified in Wu *et al.* (2020), across independent data sets.  
356 We find a core set of 12 genes which exhibit parent-of-origin DNA methylation show allele-specific

357 DNA methylation in all 33 independently generated female data sets. We have also identified a  
358 potential role for allele-specific DNA methylation in some diploid tissues of male honeybees.

## 359 **Recommendations for *B. terrestris* reciprocal cross design for parent-of-origin** 360 **DNA methylation**

361 We used whole genome re-sequencing data of the mother and father from two sets of reciprocal  
362 crosses in order to call SNPs to identify the parent-of-origin of the alleles in the offspring. We find a  
363 similar number of unique informative SNPs between our crosses compared to previous studies which  
364 have identified parent-of-origin expression in bumblebees (Marshall *et al.*, 2020b) and honeybees  
365 (Galbraith *et al.*, 2016) and parent-of-origin DNA methylation in honeybees (Wu *et al.*, 2020). This  
366 indicates the sub-species used in this study were genetically different enough to be able to identify  
367 the parent-of-origin of the alleles in the offspring. It should be noted for future study design, however,  
368 that the number of SNPs identified has a direct effect on the percentage of the genome that can be  
369 surveyed for parent-of-origin effects. For example, Smith *et al.* (2020) were only able to call around  
370 7000 informative SNPs from honeybee reciprocal crosses which meant they could only survey 17%  
371 of all genes for parent-of-origin expression. Whilst we have obtained enough resolution through  
372 SNPs, we were still unable to identify parent-of-origin DNA methylation across the entire genome  
373 of *B. terrestris*. We explore the reasons for this and make the following recommendations for a  
374 replication of this work.

375 Firstly, we sequenced the worker offspring samples to a depth of 30X, this coverage yields  
376 enough data for standard differential DNA methylation analysis even after data loss due to low  
377 mapping rates of bisulfite converted data (generally less than 60% mapping efficiency (Tran *et al.*,  
378 2014)) and removal of PCR duplicates. An additional step required to identify parent-of-origin DNA  
379 methylation involves allocating reads to the maternal or paternal chromosomes, this means only half  
380 of all remaining data is usable for each maternal/paternal-of-origin gene. Given that statistically a  
381 minimum coverage of 10 reads are required per CpG to avoid excess false positive calls (Ziller *et al.*,

382 2015), we would recommend sequencing to a depth of at least 50X in future work to maximise the  
383 final number of CpG sites which meet this minimum coverage requirement.

384 Secondly, we chose to pool DNA from worker head tissue per colony, resulting in only one  
385 sequencing library for each colony of each cross. It has recently been shown that variation in  
386 DNA methylation within Hymenopteran species can be largely driven by the underlying genotype,  
387 i.e. the genomic sequence (Yagound *et al.*, 2019; Marshall *et al.*, 2019; Yagound *et al.*, 2020).  
388 Pooling samples therefore adds additional variation per sequencing library which may confound  
389 any lineage-of-origin DNA methylation profiles. Avoiding pooling samples would therefore reduce  
390 variation per library.

391 Finally, whilst we were selective in the tissue we sequenced we would recommend sequencing  
392 even more specific tissue types as DNA methylation profiles are known to differ between tissues (Pai  
393 *et al.*, 2011). A relatively new technique called Enzymatic Methyl-Seq (Vaisvila *et al.*, 2021) may  
394 be used in place of traditional bisulfite sequencing which allows a much lower initial input DNA  
395 quantity and yields the same unmethylated-cytosine to thymine conversion as bisulfite sequencing.  
396 This may be used, for example, to examine parent-of-origin methylation profiles in individual brain  
397 samples.

### 398 **Sex- and caste-specific methylomes of *B. terrestris***

399 We were able to use the data generated in this study to explore the sex- and caste-specific methylome  
400 of *B. terrestris*. Whilst genome-wide, males show similar DNA methylation profiles to the two  
401 female castes, in terms of DNA methylation localisation to exons and depletion in promoter regions,  
402 we also found a number of differentially methylated genes between males and females. Specifically,  
403 differentially methylated genes are enriched for many histone modification related processes. It  
404 has recently been found in the silk moth that the presence of DNA methylation promotes histone  
405 H3-K27 acetylation which changes the chromatin formation of a region allowing gene expression  
406 (Xu *et al.*, 2021). The relationship between DNA methylation and histone modifications in social

407 insects remains unknown. However, recent work by Choppin *et al.* (2021) shows a role for histone  
408 acetylation in the regulation of worker reproduction and gene expression in the ant *Temnothorax*  
409 *rugatulus*. An exploration of the functional relationship between DNA methylation and histone  
410 modifications is needed across a greater diversity of insect species in order to understand how these  
411 processes may interact to produce downstream gene expression and thus phenotype differences.

412 In addition to histone related genes we also find both female castes show hypermethylated  
413 genes which are involved in telomere functions. Telomere length is thought to correlate with  
414 lifespan (Cawthon *et al.*, 2003) and it has been found in the ant *Lasius niger* that the shorter lived  
415 males do indeed possess shorter telomeres than females (Jemielity *et al.*, 2007). The lifespan of *B.*  
416 *terrestris* queens is significantly longer than workers and males (Greeff and Schmid-Hempel, 2008;  
417 Smeets and Duchateau, 2003; Duchateau and Marin, 1995). One role for DNA methylation in *B.*  
418 *terrestris* may therefore be the regulation of caste differences through core cellular processes, such  
419 as telomere maintenance. Finally, we also find differentially methylated genes between queens and  
420 reproductive workers are involved in reproductive related processes. Previous work has suggested  
421 a role for DNA methylation in reproduction in *B. terrestris* (Amarasinghe *et al.*, 2014), as well  
422 as other social insects (Wang *et al.*, 2020; Bonasio *et al.*, 2012), although this does not appear  
423 to be consistent across Hymenoptera (Libbrecht *et al.*, 2016; Patalano *et al.*, 2015). Whilst the  
424 differentially methylated genes identified here suggest a role for DNA methylation in maintaining or  
425 generating caste differences, a direct causal link between DNA methylation and gene expression  
426 changes mediating phenotypes has yet to be found.

## 427 **Consistency of parent-of-origin DNA methylation in the honeybee**

428 Genes which show parent-of-origin expression have been identified in two social insect species to  
429 date, *B. terrestris* (Marshall *et al.*, 2020b) and *A. mellifera* (Wu *et al.*, 2020). Whilst a direct link  
430 between parent-of-origin DNA methylation and parent-of-origin expression has not been found in the  
431 honeybee (Wu *et al.*, 2020; Smith *et al.*, 2020), it is possible parent-of-origin DNA methylation may

432 mediate imprinted genes in a trans- or temporal-acting fashion (Xu *et al.*, 2021; Li-Byarlay *et al.*,  
433 2020). For example, in mammals DNA methylation can act to silence an imprinting control element,  
434 which when normally expressed would silence nearby genes (Barlow, 2011). This highlights the  
435 complex nature of interactions between epigenetic mechanisms and gene expression and shows why  
436 direct correlation of expression and methylation levels of a given gene may not be indicative of the  
437 function of those specific epigenetic marks.

438         As part of this study set out to identify genes which may show consistent parent-of-origin  
439 DNA methylation across independently generated honeybee whole genome bisulfite sequencing data  
440 in order to provide a strong list of candidate genes which may be involved in genomic imprinting in *A.*  
441 *mellifera*. We find a core set of 12 genes which show allele-specific DNA methylation in 33 female  
442 data sets from both queens and workers across various tissues. One of these genes is specifically  
443 involved in regulating social behaviour. It is predicted by the kinship theory that imprinted genes in  
444 social insects should play a role in mediating worker reproductive behaviour (Haig, 2000; Queller,  
445 2003). The identification of a specific gene which may regulate this process provides an ideal  
446 candidate for experimental epigenetic manipulation, through techniques such as CRISPR-Cas9 (Vojta  
447 *et al.*, 2016), enabling a functional assessment of the parent-of-origin specific DNA methylation  
448 marks present.

449         It is also worth noting that if parent-of-origin DNA methylation does act as an imprinting  
450 mark, in some capacity in *A. mellifera*, that we might expect there to be more than 12 genes involved  
451 in genomic imprinting. Firstly, some imprinted genes in mammals are known to be tissue specific  
452 (Prickett and Oakey, 2012) and here we only examined genes with allele-specific DNA methylation  
453 when it occurred across all tissues tested. Additionally, it may be expected that workers and queens  
454 display different imprinted genes, as genomic imprinting has been suggested to play a role in caste  
455 determination in some social insects (Matsuura, 2019). Again, this suggests the 12 genes identified  
456 may only represent a subset of all imprinted genes in *A. mellifera*. It has also been suggested that  
457 imprinted genes may respond in a plastic manner to environmental conditions, for example a silenced

458 allele may become activated in order to increase gene dosage in response to external stimuli (Radford  
459 *et al.*, 2011). Imprinted genes in *A. mellifera* workers are predicted to be involved in reproduction  
460 (Haig, 2000), and so a plastic response to queen presence of some imprinted genes may account for  
461 the small number in common across independent samples. Finally, we cannot rule out that more of  
462 the genes with parent-of-origin DNA methylation identified in Wu *et al.* (2020) are not consistent  
463 across *A. mellifera* females. As discussed in the 'Recommendations for *B. terrestris* reciprocal  
464 cross design for parent-of-origin DNA methylation' section above, it may be that we did not have  
465 sufficient coverage in some genome regions / samples from the data tested for these areas to show  
466 significant allele-specific DNA methylation. Although, it's worth noting the advantage of identifying  
467 allele-specific methylation through probabilistic models as opposed to using SNPs is that we can  
468 survey homozygous regions which would usually be discounted when differences in the underlying  
469 genotype are needed for allele identification (Orjuela *et al.*, 2020).

470 Finally, of the core 12 genes identified above we find three of those genes also show allele-  
471 specific DNA methylation in some male thorax tissue, including the gene involved in social behaviour.  
472 Different tissues are known to vary in levels of ploidy in some social insects (Aron *et al.*, 2005). DNA  
473 methylation has also previously been suggested as a possible mechanism of ploidy compensation  
474 in haplodiploid insects, with Glastad *et al.* (2014) finding diploid males of the fire ant, *Solenopsis*  
475 *invicta*, show more similar methylation patterns to diploid females compared to haploid males. The  
476 discovery of genes showing allele-specific DNA methylation in male thorax tissue is suggestive of a  
477 role for DNA methylation in tissue-specific ploidy compensation in *A. mellifera*.

## 478 **Conclusion**

479 This study provides the groundwork for future research exploring parent-of-origin DNA methylation  
480 as a potential imprinting mechanism in the bumblebee *Bombus terrestris*. We specifically highlight  
481 technical recommendations for adequate data generation from reciprocal crosses needed to identify  
482 parent-of-origin DNA methylation at a genome-wide scale. We have also characterised the sex-



483 and caste-specific methylome of *B. terrestris* identifying a potential role for DNA methylation  
484 in downstream epigenetic regulatory processes which may influence sex and caste phenotypic  
485 differences. Additionally, using genes previously identified as showing parent-of-origin DNA  
486 methylation in the honeybee we have identified a core set of these genes which appear to show  
487 conserved allele-specific DNA methylation across female castes and tissues. These genes can serve  
488 as candidates for experimental manipulation to explore the functional role of parent-of-origin DNA  
489 methylation in *A. mellifera*. Finally, we have identified allele-specific DNA methylation in honeybee  
490 male thorax tissue which suggests a role for DNA methylation in ploidy compensation in this species.

## 491 **Acknowledgements**

492 We thank Biobest N.V. for providing us with the forty bumblebee colonies of the desired reciprocal  
493 crosses and Dr Ben Hunt for analysis advice. Hollie Marshall had a PhD-scholarship from the Central  
494 England NERC Training Alliance (NERC, UK). This study was funded in the context of the NERC  
495 grant NE/N010019/1 and a Leverhulme Trust Research Project Grant (RPG-2020-363) awarded  
496 to E.B.M., the KU Leuven BOF Centre of Excellence Financing on ‘Eco- and socio-evolutionary  
497 dynamics’ (Project number PF/2010/07) and a grant from the Research Foundation-Flanders (FWO-  
498 Vlaanderen, grant G.0463.12) awarded to T.W. and the European Research Council grant: PGErepro  
499 awarded to L.R. This research used the ALICE2 High Performance Computing Facility at the  
500 University of Leicester. Thank you to Christian Thomas for shipping the frozen bees from Leicester  
501 to Edinburgh.

## 502 **Author contributions**

503 E.B.M., T.W. and H.M. conceived the study. The reciprocal crosses were carried out by Biobest  
504 (Westerlo, Belgium) under supervision of F.W. J.S.Z. carried out the dissections to confirm the  
505 reproductive status of workers. H.M. carried out the wet lab work. H.M. and M.T.N carried out the

506 analyses. L.R. contributed the whole genome re-sequencing. H.M. wrote the initial manuscript. All  
507 authors contributed to and reviewed the final manuscript.

## 508 **Data Accessibility**

509 Data has been deposited in GenBank under NCBI BioProject: PRJNA779586. All code is available  
510 at: [https://github.com/MooHoll/Parent\\_of-Origin\\_Methylation](https://github.com/MooHoll/Parent_of-Origin_Methylation).

## 511 **References**

- 512 Akalin, A., Kormaksson, M., Li, S., Garrett-bakelman, F. E., Figueroa, M. E., Melnick, A., and  
513 Mason, C. E. 2012. methylKit: a comprehensive R package for the analysis of genome-wide DNA  
514 methylation profiles. *Genome Biology*, 13(R87).
- 515 Amarasinghe, H. E., Clayton, C. I., and Mallon, E. B. 2014. Methylation and worker reproduction in  
516 the bumble-bee (*Bombus terrestris*). *Proceedings of the Royal Society B: Biological Sciences*,  
517 281(20132502).
- 518 Andrews, S. 2010. Babraham Bioinformatics - FastQC A Quality Control tool for High Throughput  
519 Sequence Data. <http://www.bioinformatics.babraham.ac.uk/projects/fastqc/>, Accessed: 12-12-  
520 2020.
- 521 Aron, S., de Menten, L., Van Bockstaele, D. R., Blank, S. M., and Roisin, Y. 2005. When  
522 Hymenopteran Males Reinvented Diploidy. *Current Biology*, 15(9): 824–827.
- 523 Bain, S. A., Marshall, H., Filia, A. G., Laetsch, D. R., Husnik, F., and Ross, L. 2021. Sex-specific  
524 expression and DNA methylation in a species with extreme sexual dimorphism and paternal  
525 genome elimination. *Molecular Ecology*, page mec.15842.
- 526 Barlow, D. P. 2011. Genomic Imprinting: A Mammalian Epigenetic Discovery Model. *Annual*  
527 *Review of Genetics*, 45(1): 379–403.
- 528 Barlow, D. P. and Bartolomei, M. S. 2014. Genomic Imprinting in Mammals. *Cold Spring Harb*  
529 *Perspect Biol*, 6(a018282).
- 530 Bebane, P. S. A., Hunt, B. J., Pegoraro, M., Jones, A. R. C., Marshall, H., Rosato, E., and Mallon,  
531 E. B. 2019. The effects of the neonicotinoid imidacloprid on gene expression and DNA methylation  
532 in the buff-tailed bumblebee *Bombus terrestris*. *Proc. R. Soc. B*, 286: 20190718.
- 533 Benjamini, Y. and Hochberg, Y. 1995. Controlling the false discovery rate: a practical and powerful  
534 approach to multiple testing. *Journal of the Royal Statistical Society*, 57(1): 289–300.
- 535 Bewick, A. J., Vogel, K. J., Moore, A. J., and Schmitz, R. J. 2016. Evolution of DNA methylation  
536 across insects. *Molecular Biology and Evolution*, 34(3): 654–665.
- 537 Bonasio, R., Li, Q., Lian, J., Mutti, N. S., Jin, L., Zhao, H., Zhang, P., Wen, P., Xiang, H., Ding, Y.,  
538 Jin, Z., Shen, S. S., Wang, Z., Wang, W., Wang, J., Berger, S. L., Liebig, J. J., Zhang, G., and  
539 Reinberg, D. 2012. Genome-wide and caste-specific DNA methylomes of the ants *Camponotus*  
540 *floridanus* and *Harpegnathos saltator*. *Current Biology*, 22(19): 1755–1764.
- 541 Cardoso-Júnior, C. A. M., Yagound, B., Ronai, I., Remnant, E. J., Hartfelder, K., and Oldroyd, B. P.  
542 2021. DNA methylation is not a driver of gene expression reprogramming in young honey bee  
543 workers. *Molecular Ecology*, 30(19): 4804–4818.

- 544 Cawthon, R. M., Smith, K. R., O'Brien, E., Sivatchenko, A., and Kerber, R. A. 2003. Association  
545 between telomere length in blood and mortality in people aged 60 years or older. *The Lancet*,  
546 361(9355): 393–395.
- 547 Choppin, M., Feldmeyer, B., and Foitzik, S. 2021. Histone acetylation regulates the expression of  
548 genes involved in worker reproduction in the ant *Temnothorax rugatulus*. *BMC Genomics*, 22(1):  
549 871.
- 550 Danecek, P., Auton, A., Abecasis, G., Albers, C. A., Banks, E., DePristo, M. A., Handsaker, R. E.,  
551 Lunter, G., Marth, G. T., Sherry, S. T., McVean, G., Durbin, R., and 1000 Genomes Project  
552 Analysis Group 2011. The variant call format and VCFtools. *Bioinformatics*, 27(15): 2156–2158.
- 553 de la Folia, A. G., Mongue, A. J., Dorrens, J., Lemon, H., Laetsch, D. R., and Ross, L. 2021.  
554 Males That Silence Their Father's Genes: Genomic Imprinting of a Complete Haploid Genome.  
555 *Molecular Biology and Evolution*, 38(6): 2566–2581.
- 556 Drewell, R. a., Lo, N., Oxley, P. R., and Oldroyd, B. P. 2012. Kin conflict in insect societies: A new  
557 epigenetic perspective. *Trends in Ecology and Evolution*, 27(7): 367–373.
- 558 Duchateau, M. J. and Marin, J. 1995. Sexual biology of haploid and diploid males in the bumble  
559 bee *Bombus terrestris*. *Insectes Sociaux*, 42(3): 255–266.
- 560 Duchateau, M. J. and Velthuis, H. H. W. 1988. Development and reproduction strategies in *Bombus*  
561 *terrestris* colonies. *Behaviour*, 107: 186–207.
- 562 Elango, N., Hunt, B. G., Goodisman, M. a. D., and Yi, S. V. 2009. DNA methylation is widespread and  
563 associated with differential gene expression in castes of the honeybee, *Apis mellifera*. *Proceedings*  
564 *of the National Academy of Sciences of the United States of America*, 106(27): 11206–11211.
- 565 Elsik, C. G., Tayal, A., Diesh, C. M., Unni, D. R., Emery, M. L., Nguyen, H. N., and Hagen, D. E.  
566 2016. Hymenoptera Genome Database: integrating genome annotations in HymenopteraMine.  
567 *Nucleic Acids Research*, 44(D1): D793–D800.
- 568 Feng, S., Cokus, S. J., Zhang, X., Chen, P.-Y., Bostick, M., Goll, M. G., Hetzel, J., Jain, J., Strauss,  
569 S. H., Halpern, M. E., Ukomadu, C., Sadler, K. C., Pradhan, S., Pellegrini, M., and Jacobsen, S. E.  
570 2010. Conservation and divergence of methylation patterning in plants and animals. *Proceedings*  
571 *of the National Academy of Sciences*, 107(19): 8689–8694.
- 572 Foret, S., Kucharski, R., Pittelkow, Y., Lockett, G. A., and Maleszka, R. 2009. Epigenetic regulation  
573 of the honey bee transcriptome: unravelling the nature of methylated genes. *BMC Genomics*,  
574 10(1): 472.
- 575 Galbraith, D. A., Kocher, S. D., Glenn, T., Albert, I., Hunt, G. J., Strassmann, J. E., Queller, D. C.,  
576 and Grozinger, C. M. 2016. Testing the kinship theory of intragenomic conflict in honey bees (*Apis mellifera*). *Proceedings of the National Academy of Sciences*, 113(4): 1020–1025.

- 578 Galbraith, D. A., Ma, R., and Grozinger, C. M. 2021. Tissue-specific transcription patterns support  
579 the kinship theory of intragenomic conflict in honey bees (*Apis mellifera*). *Molecular Ecology*,  
580 30(4): 1029–1041.
- 581 Garrison, E. and Marth, G. 2012. Haplotype-based variant detection from short-read sequencing.  
582 *arXiv*. 1207.3907.
- 583 Glastad, K. M., Hunt, B. G., Yi, S. V., and Goodisman, M. a. D. 2014. Epigenetic inheritance and  
584 genome regulation: is DNA methylation linked to ploidy in haplodiploid insects? *Proceedings*.  
585 *Biological sciences / The Royal Society*, 281(1785): 20140411.
- 586 Glastad, K. M., Gokhale, K., Liebig, J., and Goodisman, M. A. D. 2016. The caste- and sex-specific  
587 DNA methylome of the termite *Zootermopsis nevadensis*. *Scientific Reports*, 6(37110).
- 588 Glastad, K. M., Arsenault, S. V., Vertacnik, K. L., Geib, S. M., Kay, S., Danforth, B. N., Rehan,  
589 S. M., Linnen, C. R., Kocher, S. D., and Hunt, B. G. 2017. Variation in DNA methylation is  
590 not consistently reflected by sociality in hymenoptera. *Genome Biology and Evolution*, 9(6):  
591 1687–1698.
- 592 Greeff, M. and Schmid-Hempel, P. 2008. Sperm reduces female longevity and increases melanization  
593 of the spermatheca in the bumblebee *Bombus terrestris* L. *Insectes Sociaux*, 55(3): 313–319.
- 594 Haig, D. 2000. The Kinship Theory of Genomic Imprinting. *Annual Review of Ecology, Evolution,*  
595 *and Systematics*, (31): 9–32.
- 596 Inoue, A., Jiang, L., Lu, F., Suzuki, T., and Zhang, Y. 2017. Maternal H3K27me3 controls DNA  
597 methylation-independent imprinting. *Nature*, 547: 419–424.
- 598 Jemielity, S., Kimura, M., Parker, K. M., Parker, J. D., Cao, X., Aviv, A., and Keller, L. 2007. Short  
599 telomeres in short-lived males: what are the molecular and evolutionary causes? *Aging Cell*, 6(2):  
600 225–233.
- 601 Kocher, S. D., Tsuruda, J. M., Gibson, J. D., Emore, C. M., Arechavaleta-Velasco, M. E., Queller,  
602 D. C., Strassmann, J. E., Grozinger, C. M., Gribskov, M. R., San Miguel, P., Westerman, R., and  
603 Hunt, G. J. 2015. A Search for Parent-of-Origin Effects on Honey Bee Gene Expression. *G3*  
604 *Genes|Genomes|Genetics*, 5(8): 1657–1662.
- 605 Krueger, F. and Andrews, S. R. 2011. Bismark: A flexible aligner and methylation caller for  
606 Bisulfite-Seq applications. *Bioinformatics*, 27(11): 1571–1572.
- 607 Langmead, B. and Salzberg, S. L. 2013. Fast gapped-read alignment with Bowtie 2. *Nature methods*,  
608 9(4): 357–359.
- 609 Lewis, S. H., Ross, L., Bain, S. A., Pahita, E., Smith, S. A., Cordaux, R., Miska, E. A., Lenhard, B.,  
610 Jiggins, F. M., and Sarkies, P. 2020. Widespread conservation and lineage-specific diversification  
611 of genome-wide DNA methylation patterns across arthropods. *PLOS Genetics*, 16(6): e1008864.

- 612 Li-Byarlay, H., Boncristiani, H., Howell, G., Herman, J., Clark, L., Strand, M. K., Tarpy, D., and  
613 Rueppell, O. 2020. Transcriptomic and Epigenomic Dynamics of Honey Bees in Response to  
614 Lethal Viral Infection. *Frontiers in Genetics*, 11: 566320.
- 615 Libbrecht, R., Oxley, P., Keller, L., and Kronauer, D. 2016. Robust DNA Methylation in the Clonal  
616 Raider Ant Brain. *Current Biology*, 26(3): 391–395.
- 617 Liu, L., Pei, C., Liu, S., Guo, X., Du, N., and Guo, W. 2018. Genetic and epigenetic changes during  
618 the invasion of a cosmopolitan species (*Phragmites australis*). *Ecology and Evolution*, (13):  
619 6615–6624.
- 620 Lonsdale, Z., Lee, K., Kiriakidu, M., Amarasinghe, H., Nathanael, D., O’Connor, C. J., and Mallon,  
621 E. B. 2017. Allele specific expression and methylation in the bumblebee, *Bombus terrestris*. *PeerJ*,  
622 5(e3798).
- 623 Lyko, F., Foret, S., Kucharski, R., Wolf, S., Falckenhayn, C., and Maleszka, R. 2010. The honey bee  
624 epigenomes: Differential methylation of brain DNA in queens and workers. *PLoS Biology*, 8(11).
- 625 Marshall, H., Lonsdale, Z. N., and Mallon, E. B. 2019. Methylation and gene expression differences  
626 between reproductive and sterile bumblebee workers. *Evolution Letters*, 3(5): 485–499.
- 627 Marshall, H., Jones, A. R. C., Lonsdale, Z. N., and Mallon, E. B. 2020a. Bumblebee Workers Show  
628 Differences in Allele-Specific DNA Methylation and Allele-Specific Expression. *Genome Biology  
629 and Evolution*, 12(8): 1471–1481.
- 630 Marshall, H., van Zweden, J. S., Van Geystelen, A., Benaets, K., Wäckers, F., Mallon, E. B., and  
631 Wenseleers, T. 2020b. Parent of origin gene expression in the bumblebee, *Bombus terrestris* ,  
632 supports Haig’s kinship theory for the evolution of genomic imprinting. *Evolution Letters*, 4(6):  
633 479–490.
- 634 Martin, M. 2011. Cutadapt removes adapter sequences from high-throughput sequencing reads.  
635 *EMBnet.journal*, 17(1): 10.
- 636 Matsuura, K. 2019. Genomic imprinting and evolution of insect societies. *Population Ecology*,  
637 62(1): 38–52.
- 638 Matsuura, K., Mizumoto, N., Kobayashi, K., Nozaki, T., Fujita, T., Yashiro, T., Fuchikawa, T.,  
639 Mitaka, Y., and Vargo, E. L. 2018. A Genomic Imprinting Model of Termite Caste Determination:  
640 Not Genetic but Epigenetic Inheritance Influences Offspring Caste Fate. *The American Naturalist*,  
641 191(6).
- 642 McKenna, A., Hanna, M., Banks, E., Sivachenko, A., Cibulskis, K., Kernysky, A., Garimella, K.,  
643 Altshuler, D., Gabriel, S., Daly, M., and DePristo, M. A. 2010. The Genome Analysis Toolkit: A  
644 MapReduce framework for analyzing next-generation DNA sequencing data. *Genome Research*,  
645 20(9): 1297–1303.

- 646 Mittwoch, U., Kalmus, H., and Webster, W. S. 1966. Deoxyribonucleic Acid Values in Dividing and  
647 Non-Dividing Cells of Male and Female Larvae of the Honey Bee. *Nature*, 210(5033): 264–266.
- 648 Oldroyd, B. P. and Yagound, B. 2021a. Parent-of-origin effects, allele-specific expression, genomic  
649 imprinting and paternal manipulation in social insects. *Philosophical Transactions of the Royal  
650 Society B: Biological Sciences*, 376(1826): 20200425.
- 651 Oldroyd, B. P. and Yagound, B. 2021b. The role of epigenetics, particularly DNA methylation,  
652 in the evolution of caste in insect societies. *Philosophical Transactions of the Royal Society B:  
653 Biological Sciences*, 376(1826): 20200115.
- 654 Orjuela, S., Machlab, D., Menigatti, M., Marra, G., and Robinson, M. D. 2020. DAMEfinder: a  
655 method to detect differential allele-specific methylation. *Epigenetics & Chromatin*, 13(1): 25.
- 656 Pai, A. A., Bell, J. T., Marioni, J. C., Pritchard, J. K., and Gilad, Y. 2011. A Genome-Wide Study  
657 of DNA Methylation Patterns and Gene Expression Levels in Multiple Human and Chimpanzee  
658 Tissues. *PLoS Genetics*, 7(2): e1001316.
- 659 Patalano, S., Vlasova, A., Wyatt, C., Ewels, P., Camara, F., Ferreira, P. G., Asher, C. L., Jurkowski,  
660 T. P., Segonds-Pichon, A., Bachman, M., González-Navarrete, I., Minoche, A. E., Krueger, F.,  
661 Lowy, E., Marcet-Houben, M., Rodriguez-Ales, J. L., Nascimento, F. S., Balasubramanian, S.,  
662 Gabaldon, T., Tarver, J. E., Andrews, S., Himmelbauer, H., Hughes, W. O. H., Guigó, R., Reik, W.,  
663 and Sumner, S. 2015. Molecular signatures of plastic phenotypes in two eusocial insect species  
664 with simple societies. *Proceedings of the National Academy of Sciences*, 112(45): 13970–13975.
- 665 Prickett, A. R. and Oakey, R. J. 2012. A survey of tissue-specific genomic imprinting in mammals.  
666 *Molecular Genetics and Genomics*, 287(8): 621–630.
- 667 Provataris, P., Meusemann, K., Niehuis, O., Grath, S., and Misof, B. 2018. Signatures of DNA  
668 Methylation across Insects Suggest Reduced DNA Methylation Levels in Holometabola. *Genome  
669 biology and evolution*, 10(4): 1185–1197.
- 670 Queller, D. C. 2003. Theory of genomic imprinting conflict in social insects. *BMC Evolutionary  
671 Biology*, page 23.
- 672 Quinlan, A. R. and Hall, I. M. 2010. BEDTools: a flexible suite of utilities for comparing genomic  
673 features. *Bioinformatics*, 26(6): 841–842.
- 674 Radford, E. J., Ferrón, S. R., and Ferguson-Smith, A. C. 2011. Genomic imprinting as an adaptative  
675 model of developmental plasticity. *FEBS Letters*, 585(13): 2059–2066.
- 676 Rodrigues, J. A. and Zilberman, D. 2015. Evolution and function of genomic imprinting in plants.  
677 *Genes and Development*, 29(24): 2517–2531.
- 678 Sadd, B. M., Barribeau, S. M., Bloch, G., de Graaf, D. C., Dearden, P., Elsik, C. G., Gadau, J.,  
679 Grimmelikhuijzen, C. J., Hasselmann, M., Lozier, J. D., Robertson, H. M., Smagghe, G., Stolle,  
680 E., Van Vaerenbergh, M., Waterhouse, R. M., Bornberg-Bauer, E., Klasberg, S., Bennett, A. K.,

- 681 Câmara, F., Guigó, R., Hoff, K., Mariotti, M., Munoz-Torres, M., Murphy, T., Santesmasses,  
682 D., Amdam, G. V., Beckers, M., Beye, M., Biewer, M., Bitondi, M. M., Blaxter, M. L., Bourke,  
683 A. F., Brown, M. J., Buechel, S. D., Cameron, R., Cappelle, K., Carolan, J. C., Christiaens,  
684 O., Ciborowski, K. L., Clarke, D. F., Colgan, T. J., Collins, D. H., Cridge, A. G., Dalmay, T.,  
685 Dreier, S., du Plessis, L., Duncan, E., Erler, S., Evans, J., Falcon, T., Flores, K., Freitas, F. C.,  
686 Fuchikawa, T., Gempe, T., Hartfelder, K., Hauser, F., Helbing, S., Humann, F. C., Irvine, F.,  
687 Jermiin, L. S., Johnson, C. E., Johnson, R. M., Jones, A. K., Kadowaki, T., Kidner, J. H., Koch, V.,  
688 Köhler, A., Kraus, F. B., Lattorff, H. M. G., Leask, M., Lockett, G. A., Mallon, E. B., Antonio,  
689 D. S. M., Marxer, M., Meeus, I., Moritz, R. F., Nair, A., Näpflin, K., Nissen, I., Niu, J., Nunes,  
690 F. M., Oakeshott, J. G., Osborne, A., Otte, M., Pinheiro, D. G., Rossié, N., Rueppell, O., Santos,  
691 C. G., Schmid-Hempel, R., Schmitt, B. D., Schulte, C., Simões, Z. L., Soares, M. P., Swevers,  
692 L., Winnebeck, E. C., Wolschin, F., Yu, N., Zdobnov, E. M., Aqrawi, P. K., Blankenburg, K. P.,  
693 Coyle, M., Francisco, L., Hernandez, A. G., Holder, M., Hudson, M. E., Jackson, L., Jayaseelan,  
694 J., Joshi, V., Kovar, C., Lee, S. L., Mata, R., Mathew, T., Newsham, I. F., Ngo, R., Okwuonu, G.,  
695 Pham, C., Pu, L.-L., Saada, N., Santibanez, J., Simmons, D., Thornton, R., Venkat, A., Walden,  
696 K. K., Wu, Y.-Q., Debyser, G., Devreese, B., Asher, C., Blommaert, J., Chipman, A. D., Chittka,  
697 L., Fouks, B., Liu, J., O'Neill, M. P., Sumner, S., Puiu, D., Qu, J., Salzberg, S. L., Scherer, S. E.,  
698 Muzny, D. M., Richards, S., Robinson, G. E., Gibbs, R. A., Schmid-Hempel, P., and Worley, K. C.  
699 2015. The genomes of two key bumblebee species with primitive eusocial organization. *Genome*  
700 *Biology*, 16(1): 76.
- 701 Schultz, M. D., Schmitz, R. J., and Ecker, J. R. 2012. 'Leveling' the playing field for analyses of  
702 single-base resolution DNA methylomes. *Trends in Genetics*, 28(12): 583–585.
- 703 Smeets, P. and Duchateau, M. J. 2003. Longevity of *Bombus terrestris* workers (Hymenoptera:  
704 Apidae) in relation to pollen availability, in the absence of foraging. *Apidologie*, 34(4): 333–337.
- 705 Smith, N. M. A., Yagound, B., Remnant, E. J., Foster, C. S. P., Buchmann, G., Allsopp, M. H., Kent,  
706 C. F., Zayed, A., Rose, S. A., Lo, K., Ashe, A., Harpur, B. A., Beekman, M., and Oldroyd, B. P.  
707 2020. Paternally-biased gene expression follows kin-selected predictions in female honey bee  
708 embryos. *Molecular Ecology*, 29(8): 1523–1533.
- 709 Supek, F., Bošnjak, M., Škunca, N., and Šmuc, T. 2011. Revigo summarizes and visualizes long  
710 lists of gene ontology terms. *PLoS ONE*, 6(7).
- 711 Tran, H., Porter, J., Sun, M.-a., Xie, H., and Zhang, L. 2014. Objective and Comprehensive  
712 Evaluation of Bisulfite Short Read Mapping Tools. *Advances in Bioinformatics*, 2014: 1–11.
- 713 Vaisvila, R., Ponnaluri, V. C., Sun, Z., Langhorst, B. W., Saleh, L., Guan, S., Dai, N., Campbell,  
714 M. A., Sexton, B. S., Marks, K., Samaranyake, M., Samuelson, J. C., Church, H. E., Tamanaha,  
715 E., Corrêa, I. R., Pradhan, S., Dimalanta, E. T., Evans, T. C., Williams, L., and Davis, T. B. 2021.  
716 Enzymatic methyl sequencing detects DNA methylation at single-base resolution from picograms  
717 of DNA. *Genome Research*, 31(7): 1280–1289.



- 718 Vojta, A., Dobrinić, P., Tadić, V., Bočkor, L., Korać, P., Julg, B., Klasić, M., and Zoldoš, V. 2016.  
719 Repurposing the CRISPR-Cas9 system for targeted DNA methylation. *Nucleic Acids Research*,  
720 44(12): 5615–5628.
- 721 Wallberg, A., Bunikis, I., Pettersson, O. V., Mosbech, M.-B., Childers, A. K., Evans, J. D., Mikheyev,  
722 A. S., Robertson, H. M., Robinson, G. E., and Webster, M. T. 2019. A hybrid de novo genome  
723 assembly of the honeybee, *Apis mellifera*, with chromosome-length scaffolds. *BMC Genomics*,  
724 20(1): 275.
- 725 Walsh, A. T., Triant, D. A., Le Tourneau, J., Shamimuzzaman, M., and Elsik, C. 2021. Hymenoptera  
726 Genome Database: new genomes and annotation datasets for improved go enrichment and  
727 orthologue analyses. *Nucleic Acids Research*, page gkab1018.
- 728 Wang, H., Liu, Z., Wang, Y., Ma, L., Zhang, W., and Xu, B. 2020. Genome-Wide Differential DNA  
729 Methylation in Reproductive, Morphological, and Visual System Differences Between Queen Bee  
730 and Worker Bee (*Apis mellifera*). *Frontiers in Genetics*, 11: 770.
- 731 Wang, X., Werren, J. H., and Clark, A. G. 2016. Allele-Specific Transcriptome and Methylome  
732 Analysis Reveals Stable Inheritance and Cis-Regulation of DNA Methylation in *Nasonia*. *PLOS*  
733 *Biology*, 14(7): e1002500.
- 734 Weiner, S. A., Galbraith, D. A., Adams, D. C., Valenzuela, N., Noll, F. B., Grozinger, C. M., and Toth,  
735 A. L. 2013. A survey of DNA methylation across social insect species, life stages, and castes reveals  
736 abundant and caste-associated methylation in a primitively social wasp. *Naturwissenschaften*,  
737 100(8): 795–799.
- 738 Wu, X., Galbraith, D. A., Chatterjee, P., Jeong, H., Grozinger, C. M., and Yi, S. V. 2020. Lineage  
739 and Parent-of-Origin Effects in DNA Methylation of Honey Bees (*Apis mellifera*) Revealed by  
740 Reciprocal Crosses and Whole-Genome Bisulfite Sequencing. *Genome Biology and Evolution*,  
741 12(8): 1482–1492.
- 742 Xu, G., Lyu, H., Yi, Y., Peng, Y., Feng, Q., Song, Q., Gong, C., Peng, X., Palli, S. R., and Zheng, S.  
743 2021. Intragenic DNA methylation regulates insect gene expression and reproduction through the  
744 MBD/Tip60 complex. *iScience*, 24(2): 102040.
- 745 Yagound, B., Smith, N. M. A., Buchmann, G., Oldroyd, B. P., and Remnant, E. J. 2019. Unique  
746 DNA Methylation Profiles Are Associated with cis-Variation in Honey Bees. *Genome Biology*  
747 *and Evolution*, 11(9): 2517–2530.
- 748 Yagound, B., Remnant, E. J., Buchmann, G., and Oldroyd, B. P. 2020. Intergenerational transfer  
749 of DNA methylation marks in the honey bee. *Proceedings of the National Academy of Sciences*,  
750 117(51): 32519–32527.
- 751 Yi, Y., Liu, Y.-B., Barron, A. B., and Zeng, Z.-J. 2021. Effects of commercial queen rearing methods  
752 on queen fecundity and genome methylation. *Apidologie*, 52(1): 282–291.

753 Ziller, M. J., Hansen, K. D., Meissner, A., and Aryee, M. J. 2015. Coverage recommendations for  
754 methylation analysis by whole-genome bisulfite sequencing. *Nature Methods*, 12(3): 230–232.
